# Supplementary material for: Synergistic Antifungal Interaction between Pseudomonas aeruginosa LV Strain Metabolites and Biogenic Silver Nanoparticles against Candida auris
Source: MDPI journal article supplement (doi:10.3390/antibiotics12050861), 2023-05-06
Supplement: s1 [file s1]

Supplementary File

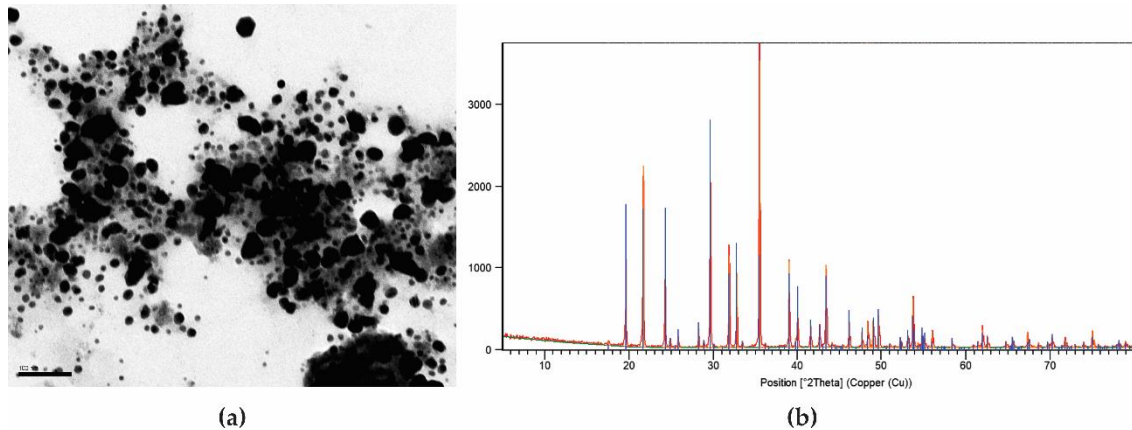

**Figure S1:** Biological silver nanoparticles synthesized by using the aqueous bark extract from *Trichilia catigua* characterization by (a) transmission electronic microscopy (TEM) and (b) X-ray diffraction (XDR) analysis. (a) TEM image shows silver nanoparticles with spherical morphology around 90-100 nm. (b) XDR image shows the characteristic peaks of silver nanoparticles.

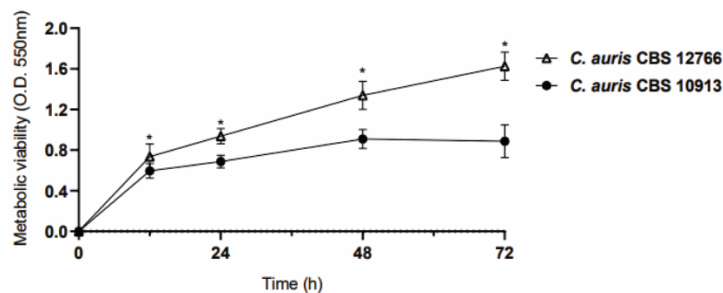

**Figure S2:** Kinetics of biofilm formation by *Candida auris* on polystyrene surface monitored by measuring the metabolic activity of sessile cells using the MTT reduction (OD<sub>550nm</sub>) assay. The values represent the mean  $\pm$  standard deviation of three independent experiments. Asterisks indicate significant difference ( $p < 0.05$ ) between metabolic activity of the strains.
